# Supplementary material for: FAM83A as a Potential Biological Marker Is Regulated by miR-206 to Promote Cervical Cancer Progression Through PI3K/AKT/mTOR Pathway
Source: PubMed Central journal article supplement (PMC7746878; doi:10.3389/fmed.2020.608441), 2020-12-04
Supplement: Data_Sheet_1.pdf [file Data_Sheet_1.pdf]

Table S1. The univariate and multivariate Cox regression model (TCGA\_CESC n=307)

| Variable             | Univariate regression |                        | Multivariate regression |                       |
|----------------------|-----------------------|------------------------|-------------------------|-----------------------|
|                      | P value               | Hazard ratio (95%CI)   | P value                 | Hazard ratio (95%CI)  |
| FAM83A (High vs Low) | 0.0054                | 1.53(1.25~2.26)        | 0.27514595              | 1.3194(0.802~2.1707)  |
| Age (ref = <=46)     |                       |                        |                         |                       |
| >46                  | 0.60566274            | 1.1282(0.7136~1.7838)  | 0.9723201               | 0.9904(0.5751~1.7056) |
| Grade (ref = G1)     |                       |                        |                         |                       |
| G2                   | 0.65658365            | 1.3068(0.4018~4.25)    | 0.67424098              | 0.7675(0.2235~2.6355) |
| G3                   | 0.81319394            | 1.1565(0.3463~3.8617)  | 0.83858782              | 0.8775(0.2496~3.0855) |
| G4                   | 0.99538217            | 0(0~Inf)               | 0.99786129              | 0(0~Inf)              |
| Unknown              | 0.22521132            | 2.2232(0.6113~8.0861)  | 0.83698011              | 0.8582(0.2~3.6831)    |
| Stage (ref = I)      |                       |                        |                         |                       |
| II                   | 0.47108372            | 0.7808(0.3984~1.5304)  | 0.39129268              | 0.6694(0.2674~1.6759) |
| III                  | 0.41495257            | 1.3225(0.6754~2.5896)  | 0.38685312              | 0.6927(0.3016~1.5911) |
| IV                   | 4.2531E-06            | 4.2391(2.2905~7.8456)  | 0.13155865              | 2.177(0.792~5.9841)   |
| Unknown              | 0.99482526            | 0(0~Inf)               | 0.99663513              | 0(0~Inf)              |
| pM (ref = M0)        |                       |                        |                         |                       |
| M1                   | 0.02432016            | 3.4696(1.1751~10.2445) | 0.84098603              | 1.1528(0.2874~4.6246) |
| Unknown              | 0.01496401            | 1.9262(1.136~3.266)    | 0.16463955              | 1.5714(0.8307~2.9726) |
| pN (ref = N0)        |                       |                        |                         |                       |
| N1                   | 0.00173806            | 2.8514(1.48~5.4935)    | 0.01018997              | 2.5214(1.2452~5.1054) |
| Unknown              | 0.00017969            | 2.9878(1.6852~5.2975)  | 0.45008632              | 1.4403(0.5588~3.7123) |
| pT (ref = Tis)       |                       |                        |                         |                       |
| T1                   | 0.99578437            | 581752.954(0~Inf)      | 0.99892672              | 7051868.7016(0~Inf)   |
| T2                   | 0.99577429            | 600514.5579(0~Inf)     | 0.99892434              | 7303453.8648(0~Inf)   |
| T3                   | 0.99550403            | 1406344.2441(0~Inf)    | 0.99886669              | 17036399.7058(0~Inf)  |
| T4                   | 0.99516369            | 4106845.2968(0~Inf)    | 0.99886077              | 18582803.6035(0~Inf)  |

Notes: The median expression of gene was used as the cut-off to divided patients into High or Low group.  
CI = Confidence Interval.

Table S2. The univariate and multivariate Cox regression model (TCGA\_CESC n=110)

| Variable             | Univariate regression |                       | Multivariate regression |                        |
|----------------------|-----------------------|-----------------------|-------------------------|------------------------|
|                      | P value               | Hazard ratio (95%CI)  | P value                 | Hazard ratio (95%CI)   |
| FAM83A (High vs Low) | 0.0019                | 1.61(1.21~2.14)       | 0.554146                | 0.8282(0.4436~1.5464)  |
| Age (ref = <=46)     |                       |                       |                         |                        |
| >46                  | 0.7464724             | 1.0971(0.6256~1.9238) | 0.973298                | 1.0105(0.5467~1.8681)  |
| Grade (ref = G1)     |                       |                       |                         |                        |
| G2                   | 0.68099913            | 1.3561(0.3174~5.7937) | 0.95323                 | 1.0468(0.2268~4.832)   |
| G3                   | 0.30268294            | 2.1375(0.5041~9.0628) | 0.484615                | 1.7233(0.3746~7.9288)  |
| G4                   | 0.99615114            | 0(0~Inf)              | 0.998339                | 0(0~Inf)               |
| Unknown              | 0.92277067            | 0.9076(0.1278~6.4473) | 0.235043                | 0.2808(0.0345~2.2846)  |
| Stage (ref = I)      |                       |                       |                         |                        |
| II                   | 0.28632993            | 0.6537(0.2993~1.428)  | 0.564171                | 0.6778(0.1807~2.5421)  |
| III                  | 0.15485529            | 0.4225(0.1289~1.3847) | 0.015359                | 0.1629(0.0376~0.7066)  |
| IV                   | 0.00021401            | 4.4149(2.0112~9.691)  | 0.048914                | 5.6484(1.0083~31.6421) |
| Unknown              | 0.9956961             | 0(0~Inf)              | 0.997495                | 0(0~Inf)               |
| pM (ref = M0)        |                       |                       |                         |                        |
| M1                   | 0.41076343            | 1.8458(0.4285~7.9508) | 0.286746                | 0.3075(0.0351~2.6923)  |
| Unknown              | 0.61691348            | 1.1605(0.6477~2.0791) | 0.786272                | 0.9068(0.447~1.8394)   |
| pN (ref = N0)        |                       |                       |                         |                        |
| N1                   | 0.01260335            | 2.4972(1.2168~5.1251) | 0.010495                | 2.7329(1.2654~5.9023)  |
| Unknown              | 0.06301106            | 1.88(0.9663~3.6574)   | 0.071365                | 2.5364(0.9222~6.9756)  |
| pT (ref = Tis)       |                       |                       |                         |                        |
| T1                   | 0.99692579            | 2344401.1893(0~Inf)   | 0.999044                | 4751343.9366(0~Inf)    |
| T2                   | 0.99699134            | 1714823.6429(0~Inf)   | 0.999056                | 3904707.0735(0~Inf)    |
| T3                   | 0.99691559            | 2461345.6419(0~Inf)   | 0.998983                | 12502764.7436(0~Inf)   |
| T4                   | 0.99656111            | 13356450.5688(0~Inf)  | 0.999023                | 6590499.7869(0~Inf)    |

Notes: The median expression of gene was used as the cut-off to divided patients into High or Low group. CI = Confidence Interval.
